# Supplementary material
Source: publisher figshare collection journal article supplement (https://sage.figshare.com/ndownloader/files/23742715)
Supplement: Supplementary file 1 [file 23742715]

Supplementary text for

A Soft Manipulator for Efficient Delicate Grasping in Shallow Water: Modelling, Control, and Real-world Experiments

Zheyuan Gong1, Xi Fang1, Xingyu Chen2, Jiahui Cheng1, Zhexin Xie1, Jiaqi Liu1, Bohan Chen1, Hui Yang1, Shihan Kong2, Yufei Hao1, Tianmiao Wang1, Junzhi Yu2, and Li Wen1,3*

1School of Mechanical Engineering and Automation, Beihang University, Beijing, 100191, People’s Republic of China

2State Key Laboratory of Management and Control for Complex Systems, Institute of Automation, Chinese Academy of Sciences, Beijing 100190, People’s Republic of China

3Beijing Advanced Innovation Center for Biomedical Engineering, Beihang University, Beijing 100191, People’s Republic of China.

* Corresponding author: Li Wen ([liwen@buaa.edu.cn](mailto:liwen@buaa.edu.cn))


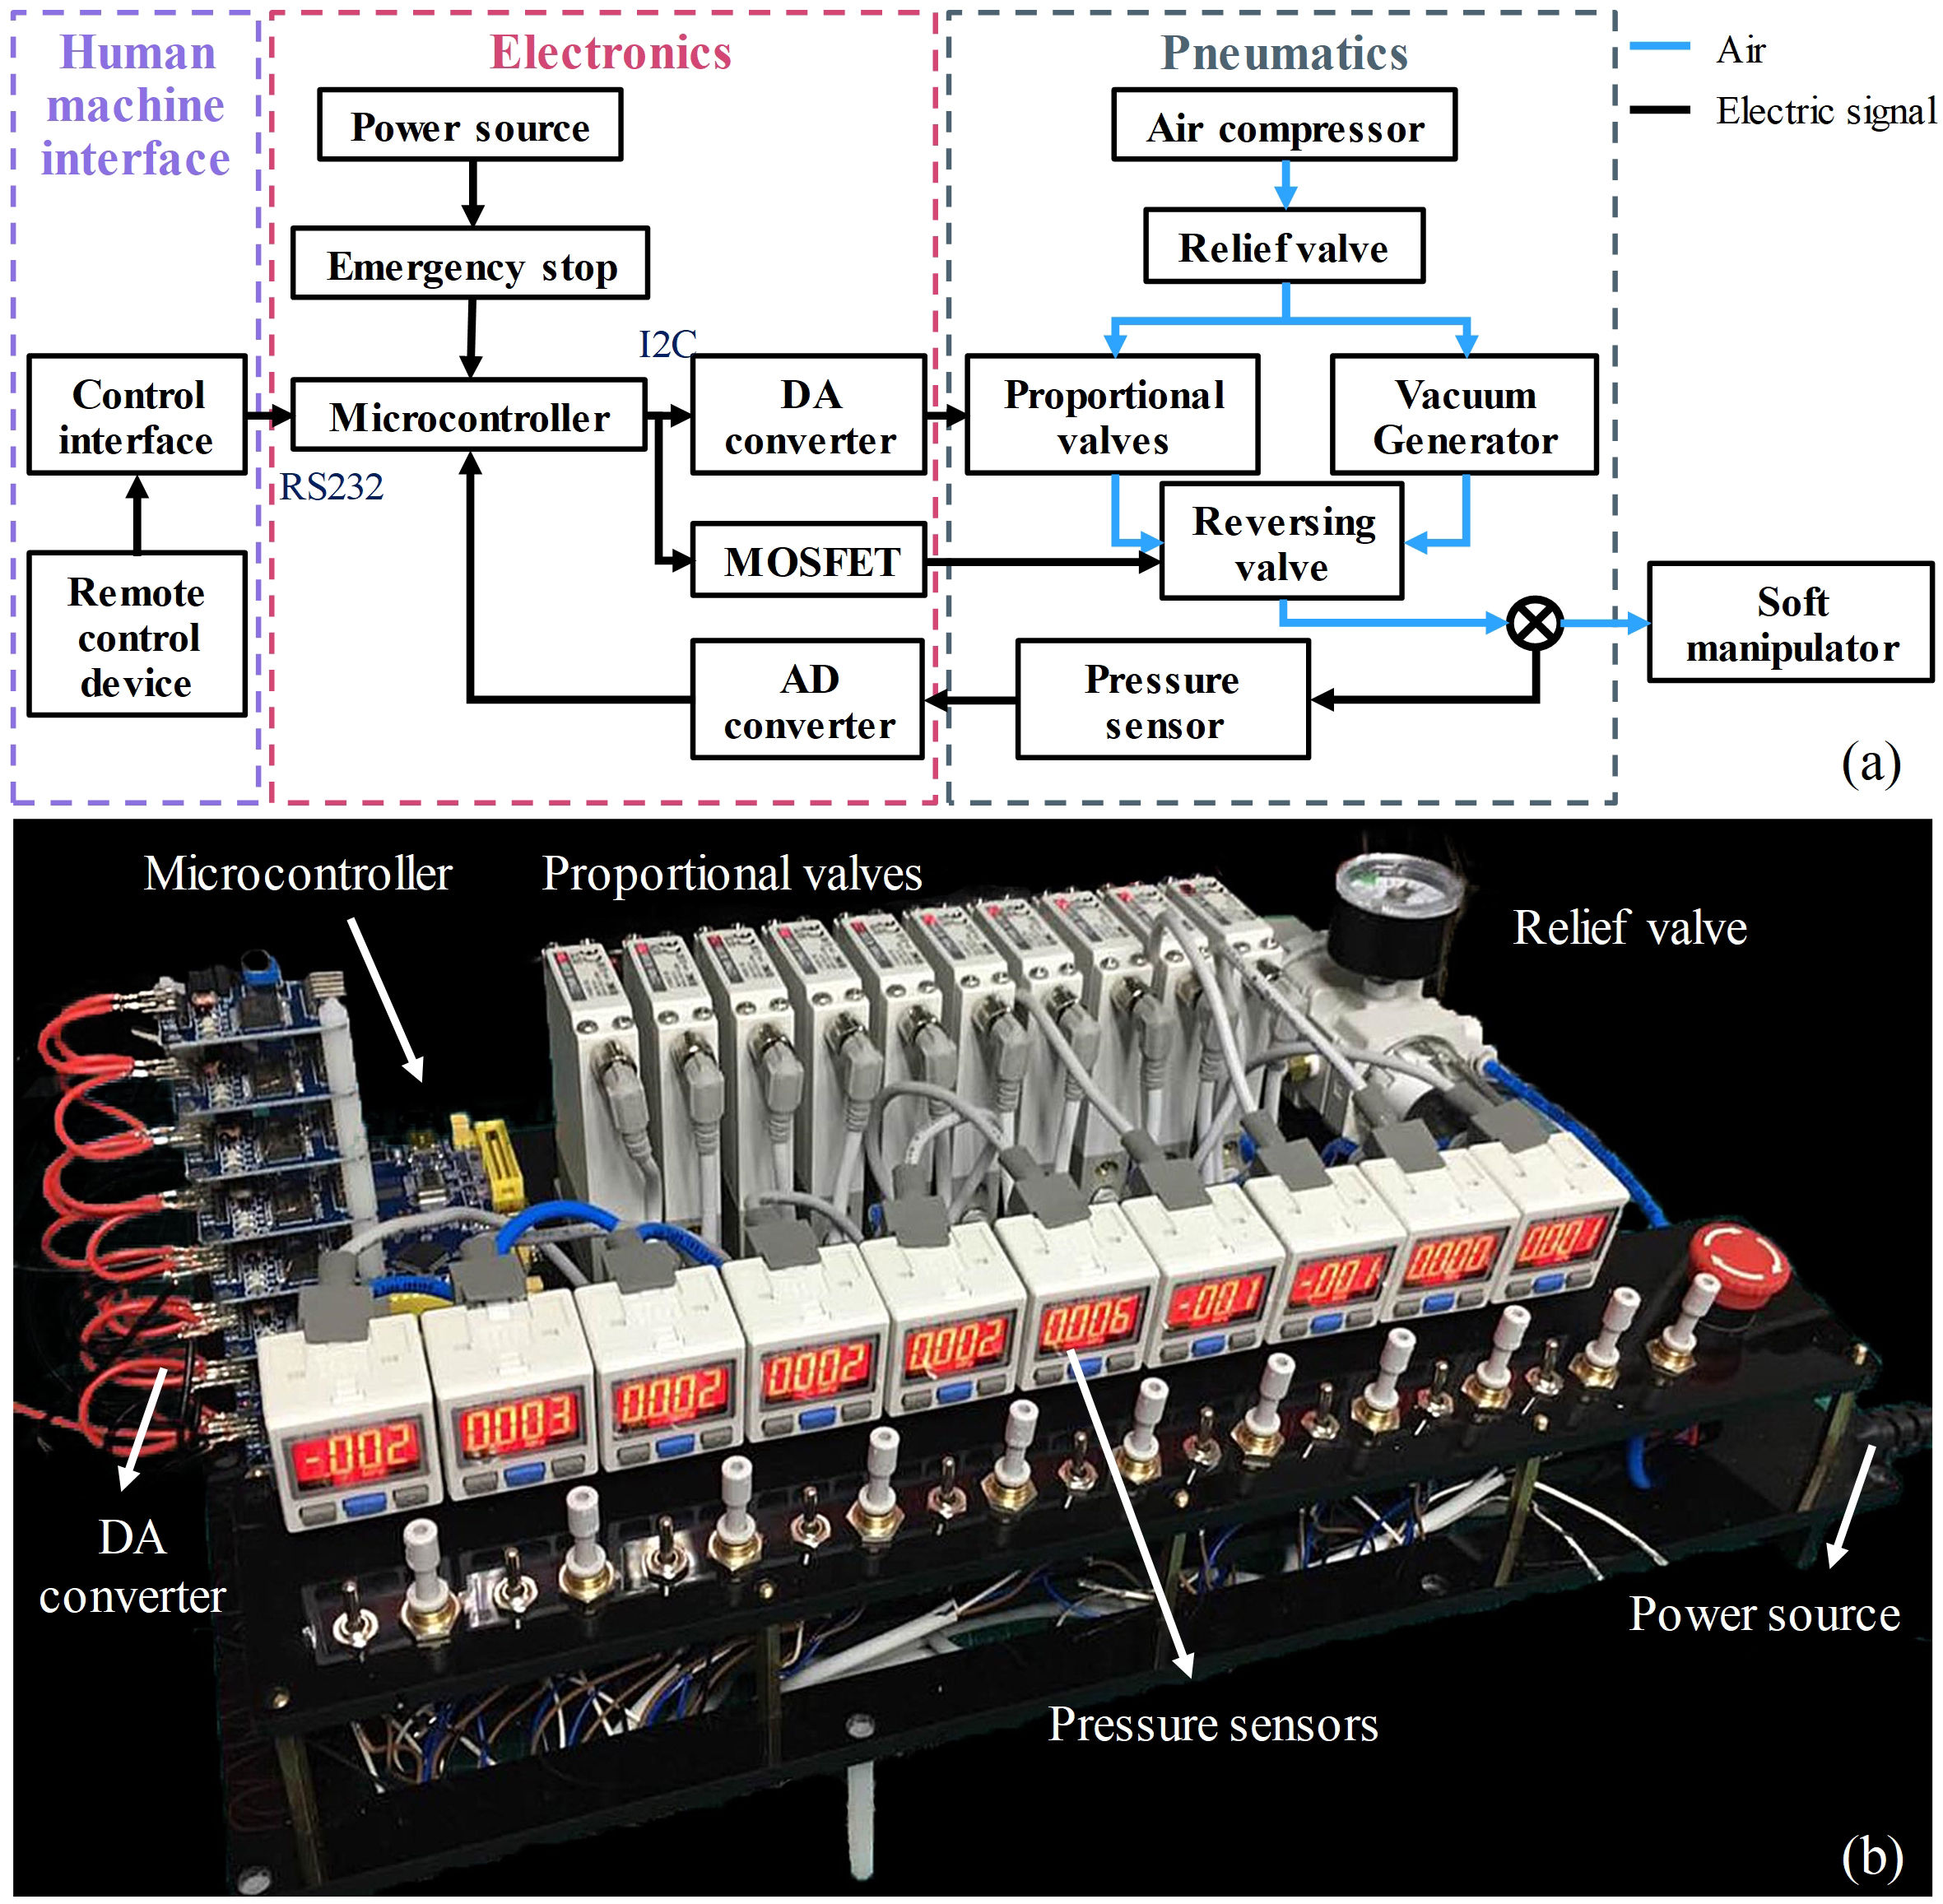


Fig. S1. Multi-channel pneumatic control system for the soft manipulator. (a) The framework of the system. (b) The hardware of the system, which contains a microcontroller, power source, DA converter, ten proportional valves, and ten air pressure sensors.


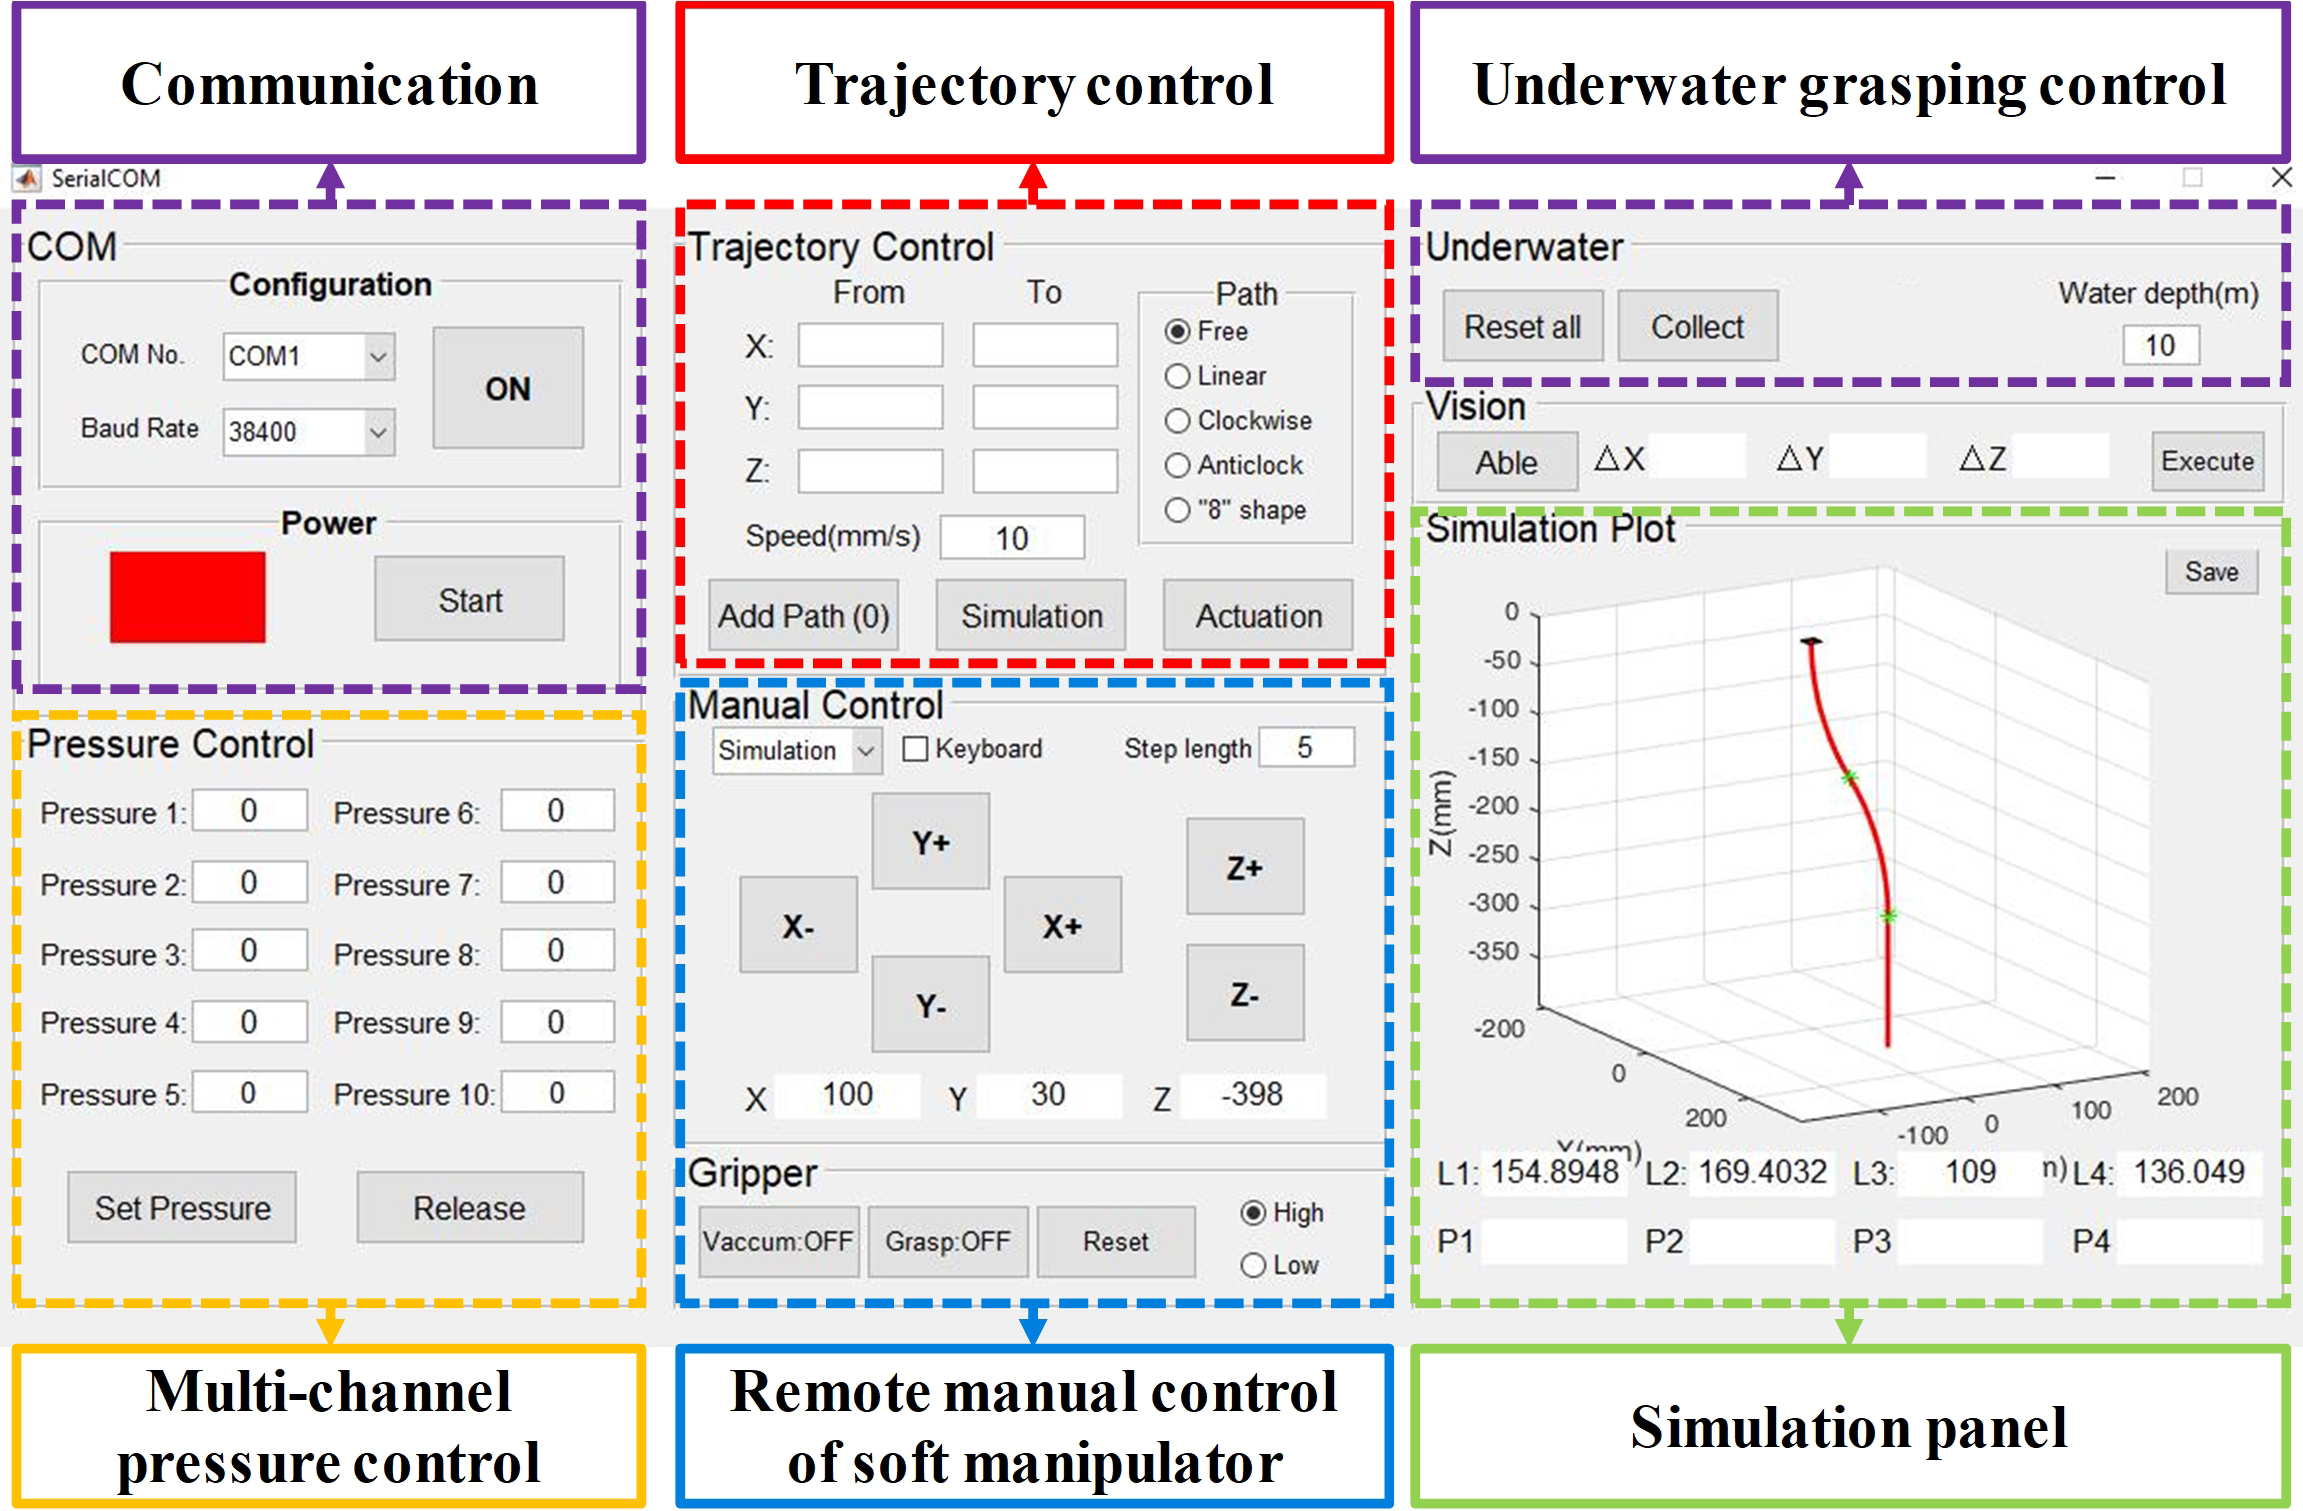


Fig. S2. The control interface of the soft manipulator. The software can control multi-channel pressure with inverse kinematics, and enable the trajectory tracing, underwater remote control and grasping as well.


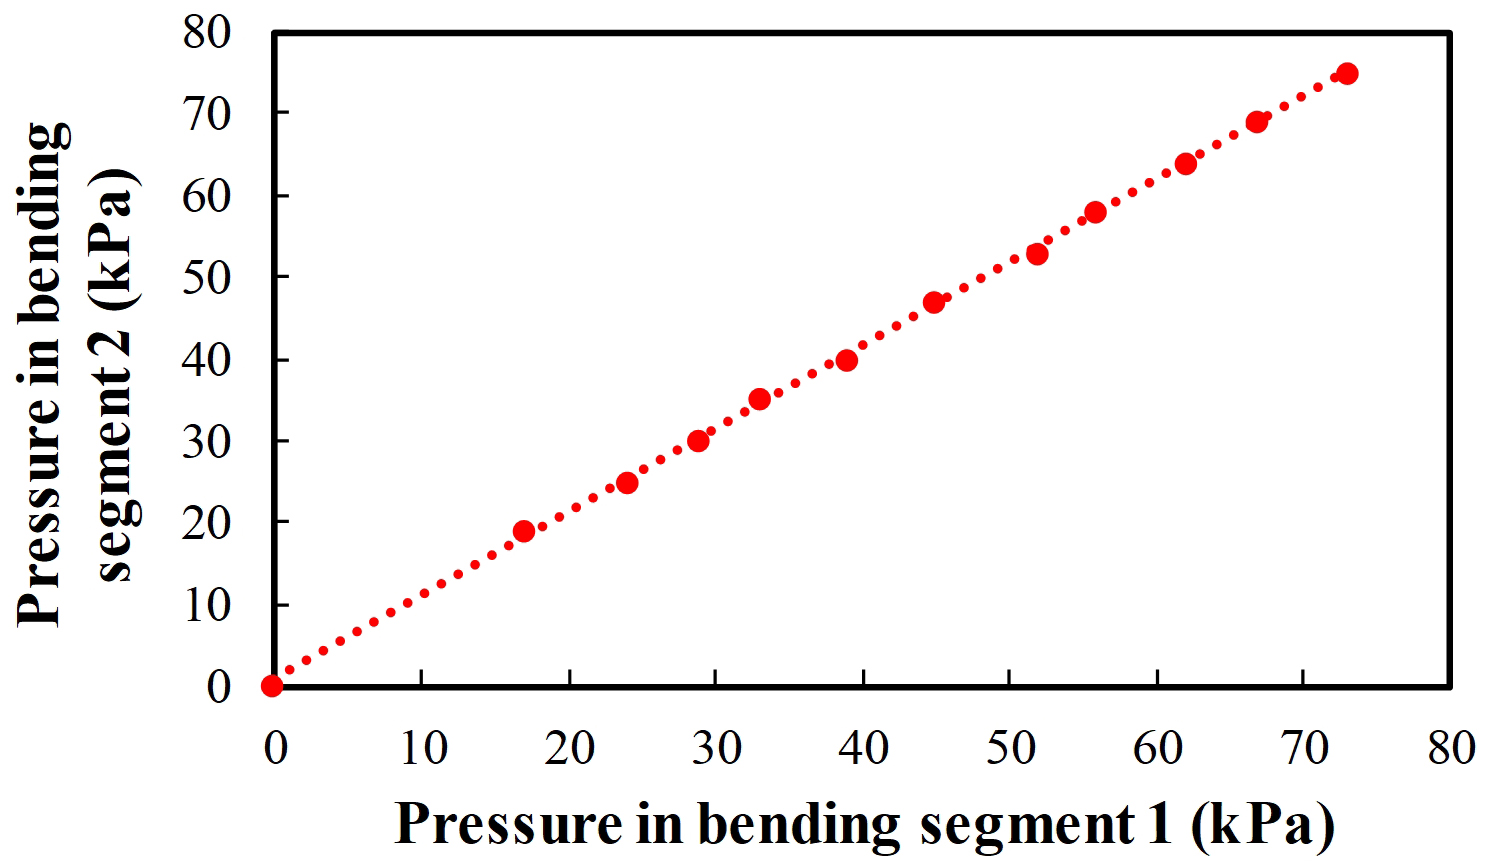


Fig. S3. Pressure calibration in bending segments 1 and 2 when the end effector is maintained vertical to the ground.


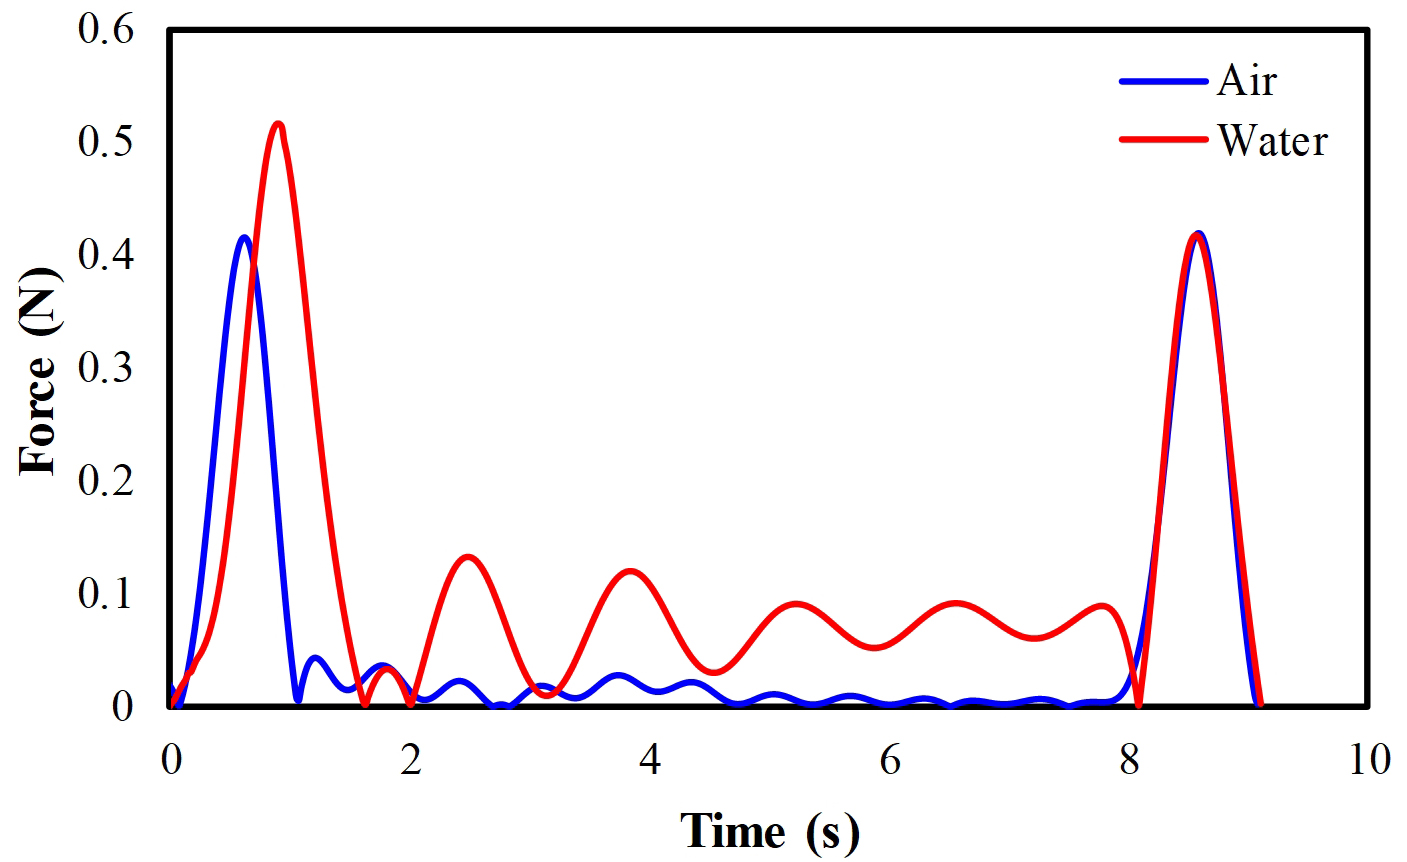


Fig. S4. Force measurements (both air and water) during the straight-line movements. The soft manipulator is controlled to move at the velocity of 50 mm/s with a total distance of 400 mm following a linear trajectory.
